# Supplementary material for: Development and feasibility study of an app (Ladle) for weight loss and behaviour change
Source: PeerJ. 2019 May 15;7:e6907. doi: 10.7717/peerj.6907 (PMC6525583; doi:10.7717/peerj.6907)
Supplement: Data S1 — Data from the trial for starters and finishers. [file peerj-07-6907-s001.xlsx]

## Sheet: Sheet1
Participant ID	Ethnic Group	Height (m)	Baseline BMI	Gender	Age	Started vs Completed Ladle	Wks Completed	Baseline wt	Wt 1	Wt 2	Wt 3	Wt 4	Wt 5	Wt 6	Wt 7	Wt 8	Wt 9	Wt 10	Wt 11	Wt 12	Wk 1 %	Wk 2 %	Wk 3 %	Wk 4 %	Wk 5 %	Wk 6 %	Wk 7 %	Wk 8 %	Wk 9 %	Wk 10 %	Wk 11 %	Wk 12 %	Final weight loss kg	Final weight loss %	No. days Healthy Breakfast Wk 1	No. days Healthy Breakfast Wk 2	No. days Healthy Breakfast Wk 3	No. days Healthy Breakfast Wk 4	No. days Healthy Breakfast Wk 5	No. days Healthy Breakfast Wk 6	No. days Healthy Breakfast Wk 7	No. days Healthy Breakfast Wk 8	No. days Healthy Breakfast Wk 9	No. days Healthy Breakfast Wk 10	No. days Healthy Breakfast Wk 11	No. days Healthy Breakfast Wk 12	No. days Eating at Planned Times Wk 2	No. days Eating at Planned Times Wk 3	No. days Eating at Planned Times Wk 4
aan422	White: English / Welsh / Scottish / Northern Irish / British	1.7	35	Male	42	Completed	4	102	101	92	95	90									-0.0098	-0.098	-0.0686	-0.1176									-12	-0.1176	6	7	7	7									5	5	5
a1.d40		1.72	27	Female	40	Completed	12	80	80	79	79	78	77	76	75.5	75	75	74.5	74.5	74.5	0	-0.0125	-0.0125	-0.025	-0.0375	-0.05	-0.0563	-0.0625	-0.0625	-0.0688	-0.0688	-0.0688	-5.5	-0.0738	7	7	7	7	7	7	7	7	7	7	7	7	7	7	6
ang313	White: English / Welsh / Scottish / Northern Irish / British	0		Female	33	Completed	5	57	56	55	55	55	54								-0.0175	-0.0351	-0.0351	-0.0351	-0.0526								-3	-0.0526	6	6	6	5	5								5	6	6
brn390	White: English / Welsh / Scottish / Northern Irish / British	1.73	26	Female	30	Completed	4	78	76	78	74.6	74									-0.0256	0	-0.0436	-0.0513									-4	-0.0513	5	7	7	7									6	5	5
cau399		1.66	31	Female	36	Completed	4	85	85	82.4	82	80.6									0	-0.0306	-0.0353	-0.0518									-4.4	-0.0518	6	7	7	7									7	7	6
da6d54	White: English / Welsh / Scottish / Northern Irish / British	1.67	27	Female	54	Completed	12	74	73.7	73.4	72.8	72.8	71.9	71.7	71.4	71.4	71	70.8	71	70.5	-0.0041	-0.0081	-0.0162	-0.0162	-0.0284	-0.0311	-0.0351	-0.0351	-0.0405	-0.0432	-0.0405	-0.0473	-3.5	-0.0473	7	7	6	6	7	7	7	7	7	7	7	7	4	4	4
cl5e53	White: English / Welsh / Scottish / Northern Irish / British	1.58	34	Female	52	Completed	4	84	80	80	80	79.8									-0.0476	-0.0476	-0.0476	-0.05									-4.2	-0.05	7	7	7	7									4	5	5
de4e57	White: English / Welsh / Scottish / Northern Irish / British	1.57	25	Female	55	Completed	9	62	61	59.6	61	60.5	60.5	59.8	59.8	58.7	58.7				-0.0161	-0.0387	-0.0161	-0.0242	-0.0242	-0.0355	-0.0355	-0.0532	-0.0532				-3.3	-0.0532	7	7	7	7	7	6	6	6	6				5	4	5
ewe248		1.6	27	Female	24	Completed	7	69	67.2	67.1	66.8	66.8	66.2	66.5	66.8						-0.0261	-0.0275	-0.0319	-0.0319	-0.0406	-0.0362	-0.0319						-2.2	-0.0319	6	6	7	5	5	6	6						1	2	5
gab655		1.73	34	Female		Completed	7	102	100.7	100.2	99.3	99.7	99.5	99.7	98.7						-0.0127	-0.0176	-0.0265	-0.0225	-0.0245	-0.0225	-0.0324						-3.3	-0.0324	4	7	6	4	7	6	7						2	4	4
hsl434	White: English / Welsh / Scottish / Northern Irish / British	1.73	25	Female	43	Completed	4	76	76	76	72	72									0	0	-0.0526	-0.0526									-4	-0.0526	7	7	7	7									4	4	4
j-n561	White: English / Welsh / Scottish / Northern Irish / British	1.58	30	Female	51	Completed	7	74	73	72.57	72.12	71.66	71.66	71.66	71.67						-0.0135	-0.0193	-0.0254	-0.0316	-0.0316	-0.0316	-0.0315						-2.33	-0.0315	6	6	6	6	6	4	3						4	5	5
jat554	White: English / Welsh / Scottish / Northern Irish / British	1.62	36	Female	54	Completed	11	94		91.6	91.9	91.2	91.5	90.8	91.2		90.5	90.4	90.7			-0.0255	-0.0223	-0.0298	-0.0266	-0.034	-0.0298		-0.0372	-0.0383	-0.0351		-3.3	-0.0351		7	6	5	5	7	6	7	7	7	7		7	6	5
jo5_52		1.78	29	Male	52	Completed	12	93	91	89	89	87	86.6	85.9	85.4	85.1	84	84.4		81.5	-0.0215	-0.043	-0.043	-0.0645	-0.0688	-0.0763	-0.0817	-0.0849	-0.0968	-0.0925		-0.1237	-11.5	-0.1237	7	7	7	7	6	7	7	7	7	7			7	7	7
kah637		1.67	28	Female	37	Completed	11	79		77.9	77.1	76.9	76	76.2	75.9	75.8	75.1	75 2	75			-0.0139	-0.0241	-0.0266	-0.038	-0.0354	-0.0392	-0.0405	-0.0494		-0.0506		-4	-0.0506		6	7	6	0	7	5	1	6	6	5		6	6	6
ke9943		1.82	28	Male		Completed	7	93	92.3	90.4	89.8	90.1	90		89.4						-0.0075	-0.028	-0.0344	-0.0312	-0.0323		-0.0387						-3.6	-0.0387	7	7	7	6	6		7						5	6	7
mr4e41	White: English / Welsh / Scottish / Northern Irish / British	1.65	38	Female	41	Completed	4	103	102	101	100.2	98									-0.0097	-0.0194	-0.0272	-0.0485									-5	-0.0485	5	5	7	6									5	5	5
lf@354	White: English / Welsh / Scottish / Northern Irish / British	1.62	30	Female	54	Completed	4	79	78.92	79.37	74	74									-0.001	0.0047	-0.0633	-0.0633									-5	-0.0633	7	7	7	7									5	4	5
li44.44	White: English / Welsh / Scottish / Northern Irish / British	1.62	34	Female	44	Completed	4	88	89	83.3		83.3									0.0114	-0.0534		-0.0534									-4.7	-0.0534	5	6		6									6		6
ra5456	White: English / Welsh / Scottish / Northern Irish / British	1.58	33	Female	45	Completed	4	83	82.5		81.6	81.2									-0.006		-0.0169	-0.0217									-1.8	-0.0217	7		7	6										5	4
rzr563		1.5	50	Female	56	Completed	8	113	113.5	113	112.5	112	111.8		111.5	110.4					0.0044	0	-0.0044	-0.0088	-0.0106		-0.0133	-0.023					-2.6	-0.023	7	7	7	7	7		5	6					6	6	6
sa4y64	White: English / Welsh / Scottish / Northern Irish / British	1.54	31	Female	64	Completed	4	74	71	71	69.85	69.85									-0.0405	-0.0405	-0.0561	-0.0561									-4.15	-0.0561	5	0	4	4									6	6	6
sa5u37		1.75	26	Male	37	Completed	12	80	77	78	77	76.5	75	75	76	76	75	75	75	74.5	-0.0375	-0.025	-0.0375	-0.0438	-0.0625	-0.0625	-0.05	-0.05	-0.0625	-0.0625	-0.0625	-0.0688	-5.5	-0.0688	7	7	6	7	7	7	2						2	6	4
sy8a66		1.6	32	Female	66	Completed	8	82	82.5	81.6	81	77	76	77	77	76					0.0061	-0.0049	-0.0122	-0.061	-0.0732	-0.061	-0.061	-0.0732					-6	-0.0732	7	7	7	7	7	7	7	7					5	5	6
vi9o42		1.66	28	Female	42	Completed	6	78	76.6	76.6	76.5	76	75.8	77.1							-0.0179	-0.0179	-0.0192	-0.0256	-0.0282	-0.0115							-0.9	-0.0115	6	7	7	7	7	7							6	4	3
vs8y56	White: Irish	1.52	31	Female	56	Started	3	71	69	69	68.2										-0.0282	-0.0282	-0.0394										-2.8	-0.0394	7	6	7										5	5
we6y49		1.58	36	Female	49	Completed	6	90	90	89.7	88.4	89.7	89.2	88.9							0	-0.0033	-0.0178	-0.0033	-0.0089	-0.0122							-1.1	-0.0122	6	7	5	5	6	6							5	5	4
men542	Pakistani	1.45	31	Female	42	Completed	4	66	65.3	65	63.9	64.6									-0.0106	-0.0152	-0.0318	-0.0212									-1.4	-0.0212	4	5	7	5									5	5	6
mah690		1.6	26	Female	69	Completed	12	66	66	65	64	64	64	63			63	62.5	62.1	61.5	0	-0.0152	-0.0303	-0.0303	-0.0303	-0.0455			-0.0455	-0.053	-0.0591	-0.0682	-4.5	-0.0682	4	5	7	7	7	7			7	7	7	7	2	7	7
22e533	White: English / Welsh / Scottish / Northern Irish / British	1.56	25	Female	53	Completed	12	60	59.87	59	59	58.5	58.7	57.7	57.4	57.3	58.3	58.3	57.9	56.9	-0.0022	-0.0167	-0.0167	-0.025	-0.0217	-0.0383	-0.0433	-0.045	-0.0283	-0.0283	-0.035	-0.0517	-3.1	-0.0517	7	7	7	7	7	7	7	7	7	7	7	7	7	7	2
yvn754		1.58	26	Female	71	Completed	12	65	65	65	64.8	64.8	64.3	63.9	64		63.9	63.9	63.5	63	0	0	-0.0031	-0.0031	-0.0108	-0.0169	-0.0154		-0.0169	-0.0169	-0.0231	-0.0308	-2	-0.0308	7	7	7	7	7	7	7		7	7	7	7	6	6	6
alk583		1.7	27	Female	54	Started	3	77	75.7	75.7	74.9										-0.0169	-0.0169	-0.0273										-2.1	-0.0273	7	6	7										4	5
anl522		1.6	27	Female	53	Started	3	70	68.4	67.13	68.4										-0.0229	-0.041	-0.0229										-1.6	-0.0229	5	7	7										3	4
mas525	African	1.64	51	Female	52	Started	2	137	137	135											0	-0.0146											-2	-0.0146	7	7											5
baa346		1.73	27	Female	36	Started	3	81	78	78	77										-0.037	-0.037	-0.0494										-4	-0.0494	5	5	6										5	6
cau252	White: English / Welsh / Scottish / Northern Irish / British	1.81	32	Male	25	Started	3	105	108	108	101										0.0286	0.0286	-0.0381										-4	-0.0381	4	4	4										4	5
chs562	White: English / Welsh / Scottish / Northern Irish / British	1.6	30	Female	56	Started	2	78	76.4	75.4											-0.0205	-0.0333											-2.6	-0.0333	6	7											4
ja_202		1.83	27	Male	20	Started	1	90	90.17												0.0019												0.17	0.0019	5
ja.5422		1.65	42	Female	54	Started	2	113	113.5	113.6											0.0044	0.0053											0.6	0.0053	7	7											3
jhp681	White: English / Welsh / Scottish / Northern Irish / British	1.8	35	Male	68	Started	1	112	110												-0.0179												-2	-0.0179	7
kae458	White: English / Welsh / Scottish / Northern Irish / British	1.52	30	Female	45	Started	2	69	69	67											0	-0.029											-2	-0.029	6	7											5
kih539	White: English / Welsh / Scottish / Northern Irish / British	1.56	35	Female	59	Started	3	86	84.5	85	85										-0.0174	-0.0116	-0.0116										-1	-0.0116	7	6	7										5	6
ma.555	White: English / Welsh / Scottish / Northern Irish / British	1.82	25	Male	55	Started	3	84	84.8	84.4	84										0.0095	0.0048	0										0	0	7	7	7										3	5
mlh466	White: English / Welsh / Scottish / Northern Irish / British	1.82	38	Male	46	Started	3	125	124.4	121.9	121										-0.0048	-0.0248	-0.032										-4	-0.032	5	7	5										6	5
mie427	White: English / Welsh / Scottish / Northern Irish / British	1.7	33	Female	47	Started	2	95	95	96											0	0.0105											1	0.0105	4	2											4
phj314	White: English / Welsh / Scottish / Northern Irish / British	1.66	34	Male	34	Started	3	93	92.3	14.5	91.3										-0.0075	-0.8441	-0.0183										-1.7	-0.0183	6	7	7										3	7
rat309	Indian	1.61	28	Female	39	Started	1	72	71.4												-0.0083												-0.6	-0.0083	7
rec263	White: English / Welsh / Scottish / Northern Irish / British	1.65	27	Female	25	Started	2	74	71.7	73											-0.0311	-0.0135											-1	-0.0135	4	2											3
sjn493		1.65	30	Female	49	Started	1	82	81.2												-0.0098												-0.8	-0.0098	5
hoi551	White: English / Welsh / Scottish / Northern Irish / British	1.65	31	Female	51	Started	2	85	84.9	85											-0.0012	0											0	0	5	6											6
ste371	White: English / Welsh / Scottish / Northern Irish / British	1.64	35	Female	32	Started	1	93	95												0.0215												2	0.0215	2
sun571		1.58	40	Female	55	Started	1	99	97												-0.0202												-2	-0.0202	5
hut699	White: English / Welsh / Scottish / Northern Irish / British	1.6	26	Female	61	Started	1	66	65.2												-0.0121												-0.8	-0.0121	6
vjl373		1.7	36	Female	34	Started	2	104	103	102											-0.0096	-0.0192											-2	-0.0192	5	2											3
za_290	Pakistani	1.52	30	Female	20	Started	3	70	67	64	60										-0.0429	-0.0857	-0.1429										-10	-0.1429	5	4	3										7	5
ded727		1.65	36	Female	72	Started	2	97	96	95.3											-0.0103	-0.0175											-1.7	-0.0175	7	7											6
oli663		1.65	30	Female	66	Started	2	81	82	81											0.0123	0											0	0	7	7											2
kae428	White: English / Welsh / Scottish / Northern Irish / British	1.7	37	Female	41	Started	1	106	105												-0.0094												-1	-0.0094	5
med572				Female	59	Started	3	240	238	238	238										-0.0083	-0.0083	-0.0083										-2	-0.0083	5	4	3										4	3
an.483	White: English / Welsh / Scottish / Northern Irish / British	1.61	35	Female	48	Completed	4	90	87	87	87	87									-0.0333	-0.0333	-0.0333	-0.0333									-3	-0.0333	7		7	7										4	5
ant581	White: English / Welsh / Scottish / Northern Irish / British	1.72	38	Female	50	Completed	6	111	111	111	111	109	109	109							0	0	0	-0.018	-0.018	-0.018							-2	-0.018	5	5	3	3	4	5							3	5	2
cai493	White: English / Welsh / Scottish / Northern Irish / British	1.78	27	Female	49	Started	3	85		84	84											-0.0118	-0.0118										-1	-0.0118		3	5										4	5
jua577	White: English / Welsh / Scottish / Northern Irish / British	1.84	41	Female	50	Started	2	139	139	138											0	-0.0072											-1	-0.0072	7	7											5
ali503		1.6	27	Female	50	Started	2	68	65	65											-0.0441	-0.0441											-3	-0.0441	7	7											2
da.605		1.72	26	Male	60	Started	2	76	76	76											0	0											0	0	5	6											6
fli511	Other	1.78	26	Male	50	Started	1	83	83												0												0	0	3
gck524	White: English / Welsh / Scottish / Northern Irish / British	1.67	28	Female	53	Started	3	77	77	77	77										0	0	0										0	0	7	7	7										6	5
ja.191	White: English / Welsh / Scottish / Northern Irish / British	1.7	27	Female	19	Started	1	78	78												0												0	0	2
jwt593	White: English / Welsh / Scottish / Northern Irish / British	1.73	25	Female	52	Started	1	75	75												0												0	0	7
jon373		1.72	28	Female	34	Started	1	83	83												0												0	0	7
kaa631		1.62	37	Female	63	Started	1	97	97												0												0	0	6
laa374	White: English / Welsh / Scottish / Northern Irish / British	1.66	30	Female	37	Started	2	82	82	82											0	0											0	0	7	4											5
los337	White: English / Welsh / Scottish / Northern Irish / British	1.73	43	Female	33	Started	1	130	130												0												0	0	5
dei543	White: English / Welsh / Scottish / Northern Irish / British	1.78	26	Female	54	Started	1	82	82												0												0	0	7
jow491		1.72	29	Female	49	Completed	5	87	87	88.2	87.6	87.7	88.2								0	0.0138	0.0069	0.008	0.0138								1.2	0.0138	7	5	5	5	5								6	6	7
[truncated: 48 more columns]
